# Supplementary material
Source: PubMed Central journal article supplement (PMC6644388)
Supplement: ao8b02520_si_001.pdf [file ao8b02520_si_001.pdf]

## Electronic Supplementary Information

# Efficient energy harvesting in SnO<sub>2</sub> based dye-sensitized solar cell utilizing nano-amassed mesoporous zinc oxide hollow microspheres as synergy boosters

*Avishek Banik, Mohammad Shaad Ansari, Mohammad Qureshi \**

Department of Chemistry, Indian Institute Technology, Guwahati – 781039, Assam, India

\*E-mail: [mq@iitg.ac.in](mailto:mq@iitg.ac.in)

### Table of Contents

|       |                                                                                               |    |
|-------|-----------------------------------------------------------------------------------------------|----|
| I.    | FESEM images of SnO <sub>2</sub> nanoparticle photoanode .....                                | S1 |
| II.   | Cross-sectional FESEM images of champion photoanode.....                                      | S2 |
| III.  | Top View FESEM images of champion photoanode .....                                            | S3 |
| IV.   | High-magnification TEM images of nano-amassed ZnO HS.....                                     | S4 |
| V.    | BET surface area analysis of SnO <sub>2</sub> nanoparticle .....                              | S5 |
| VI.   | Photovoltaic properties of ZnO HS based DSSC .....                                            | S6 |
| VII.  | Table S1: Photovoltaic parameters of ZnO HS based DSSC                                        |    |
| VIII. | Table S2: Chemisorption analysis.                                                             |    |
| IX.   | Energy Dispersive X-ray Analysis .....                                                        | S7 |
| X.    | Table S3: A comparative study of various SnO <sub>2</sub> _ZnO based Photovoltaics            |    |
| XI.   | Stability tests for SnO <sub>2</sub> Nanoparticle and SZ <sub>20</sub> based solar cell ..... | S8 |
| XII.  | Table S4: EIS fitting parameter for DSSCs                                                     |    |

## I. FESEM image of SnO<sub>2</sub> nanoparticles based photoanode.

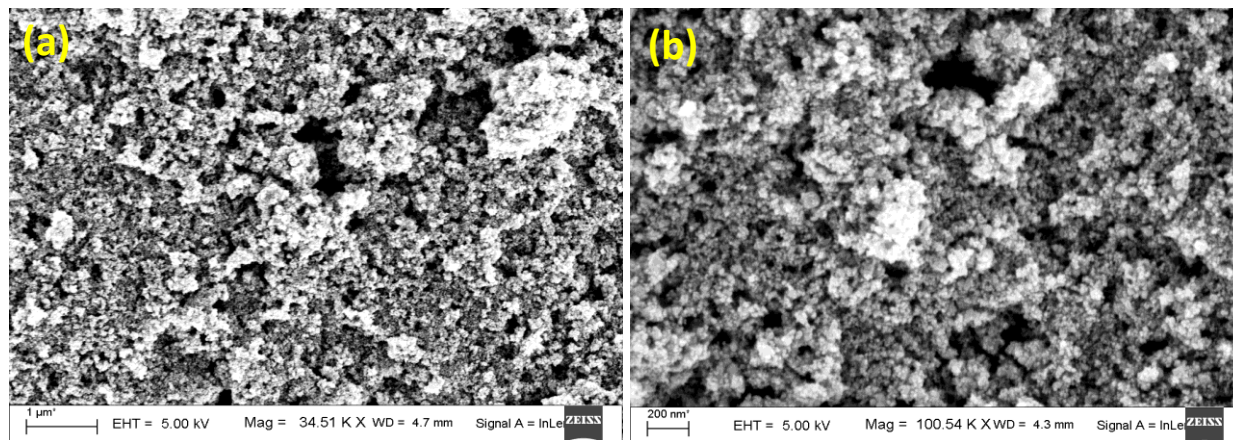

**Figure S1.** Low resolution (a) and high resolution (b) FESEM images of SnO<sub>2</sub> nanoparticle based photoanode

## II. Cross-sectional FESEM image of champion photoanode (SZ<sub>20</sub>)

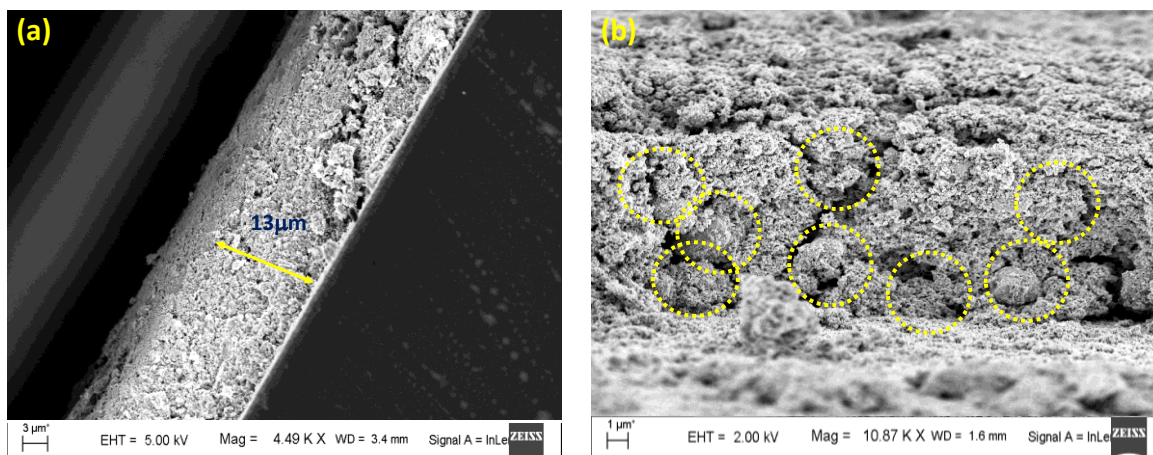

**Figure S2.** (a) Lower magnification and (b) Higher magnification cross-sectional FESEM image of photoanode SZ<sub>20</sub>.

### III. Top View FESEM image of champion photoanode (SZ<sub>20</sub>)

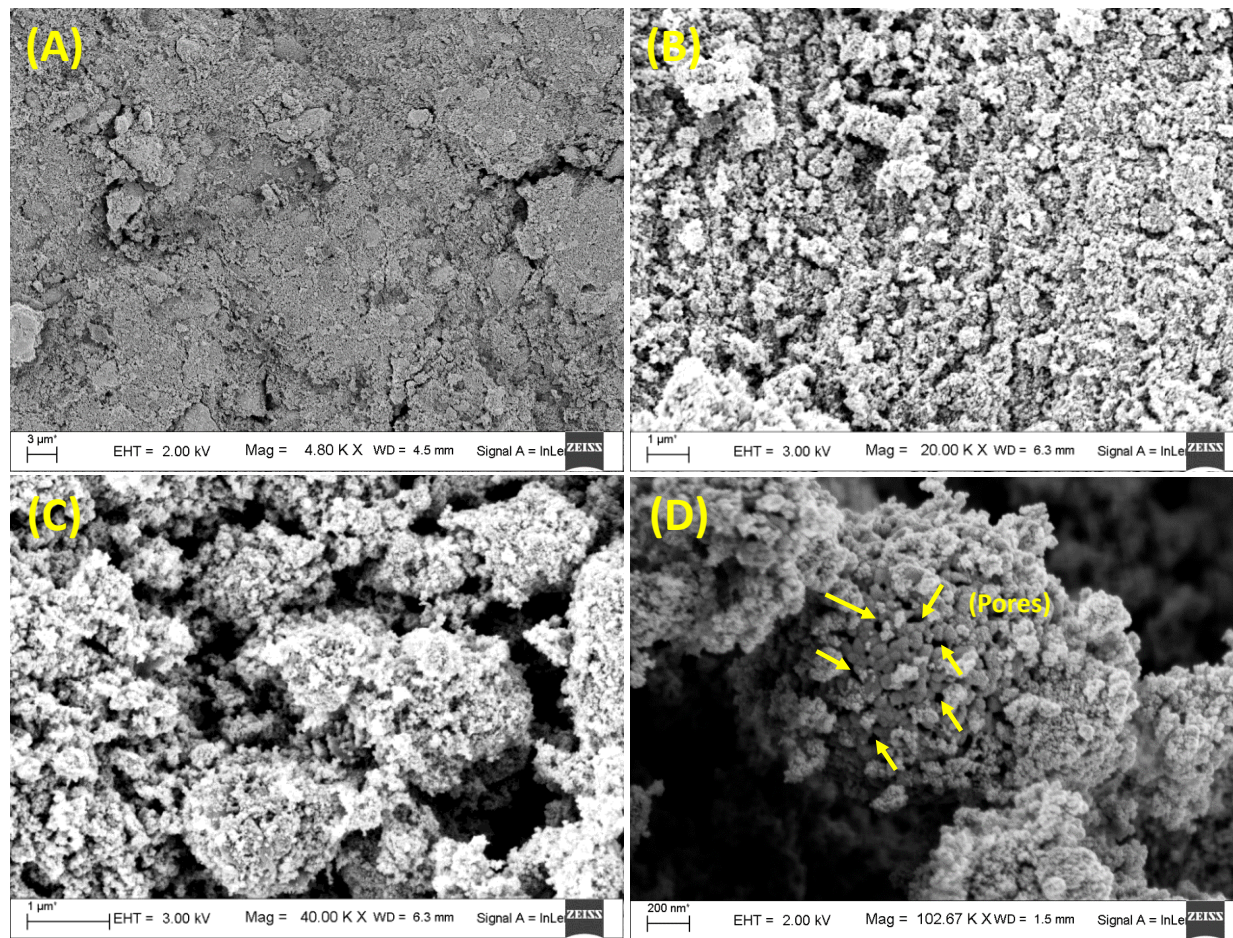

**Figure S3.** (a) Lower magnification and (b,c,d) Higher magnification top-view FESEM image of photoanode SZ<sub>20</sub>.

#### IV. High-magnification TEM images of *meso*-ZnO hollow spheres

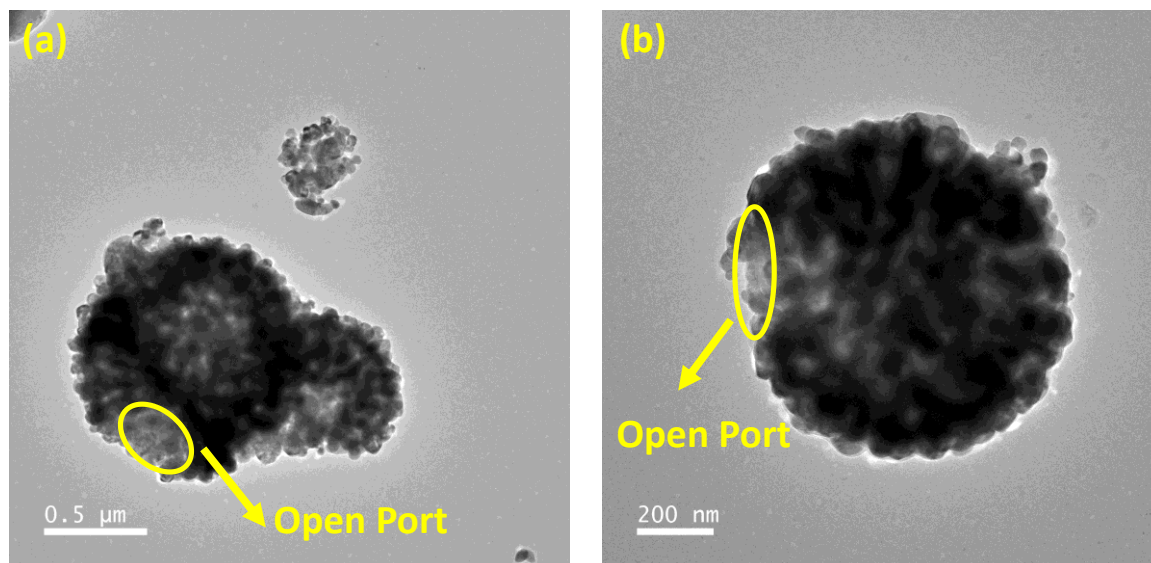

**Figure S4.** (a,b) Higher magnification TEM images of *meso*-ZnO Hollow spheres.

#### V. BET surface area analysis of SnO<sub>2</sub> nanoparticle.

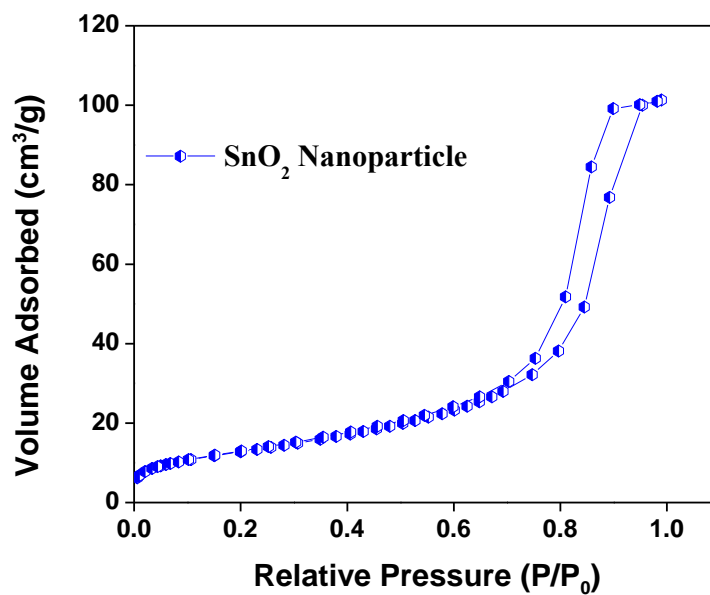

**Figure S5:** Nitrogen adsorption-desorption isotherms for SnO<sub>2</sub> nanoparticle.

## VI. Current density-Voltage ( $J_{sc}$ -V) curve for bare ZnO HS based DSSC.

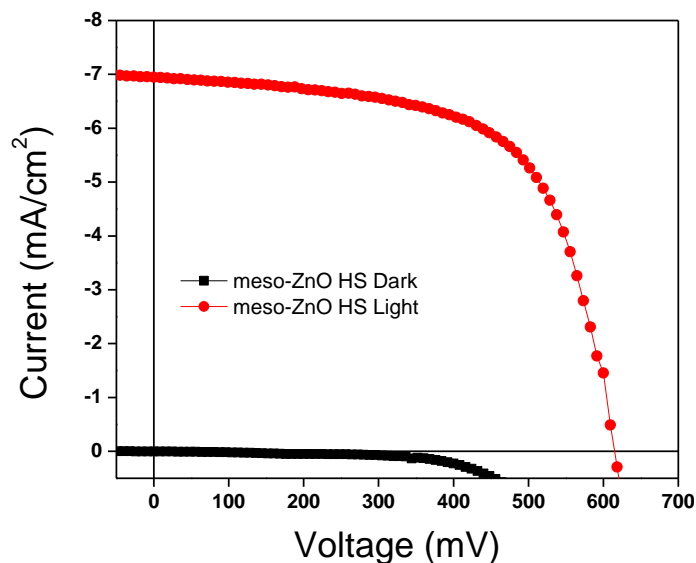

**Figure S6:** Short circuit current density- Voltage curve for bare ZnO HS DSSC

## VII: Photovoltaic parameters of ZnO HS based DSSC

**Table S1: Short-Circuit Photocurrent Density ( $J_{sc}$ ),<sup>a</sup> Open-Circuit Voltage ( $V_{oc}$ ),<sup>a</sup> Fill Factor (FF),<sup>a</sup> Power Conversion Efficiency (PCE,  $\eta$ ) for the ZnO HS based fabricated DSSCs employing I<sup>-</sup>/I<sub>3</sub><sup>-</sup> Redox couple.**

| Device              | $J_{sc}$ (mA/cm <sup>2</sup> ) | $V_{oc}$ (mV)  | FF (%)            | PCE (%) |
|---------------------|--------------------------------|----------------|-------------------|---------|
| <i>Meso</i> -ZnO HS | 6.95 ( $\pm$ 0.3)              | 616 ( $\pm$ 8) | 63.1 ( $\pm$ 1.3) | 2.71    |

<sup>a</sup>Data reported are the results of the best performed devices out of a minimum of five devices. The standard deviations for evaluated for five devices are included.

## VIII: Chemisorption analysis

**Table S2: Amount of dye chemisorbed for various photoanodes.**

| Photoanodes | Dye Adsorbed (mol.cm <sup>-2</sup> ) |
|-------------|--------------------------------------|
|-------------|--------------------------------------|

|                                                      |                       |
|------------------------------------------------------|-----------------------|
| SnO <sub>2</sub>                                     | $4.21 \times 10^{-8}$ |
| SnO <sub>2</sub> NP_ZnO HS (9:1), SZ <sub>10</sub> . | $4.78 \times 10^{-8}$ |
| SnO <sub>2</sub> NP_ZnO HS (8:2), SZ <sub>20</sub> . | $4.91 \times 10^{-8}$ |
| SnO <sub>2</sub> NP_ZnO HS (7:3), SZ <sub>30</sub> . | $4.46 \times 10^{-8}$ |

Quantity of dye chemisorbed onto the photoanodes was estimated by employing a dye adsorption–desorption process using a 0.1 mM NaOH in equal proportion of ethanol/water (1:1, v/v). Briefly, each of the dye sensitized photoanodes were immersed in a 0.1mM NaOH solution in 1:1 ethanol: water mixture. The dipped photoanodes were then removed from the solution after complete desorption and the UV-vis absorption was recorded. The concentration of the dye desorbed per sq. cm area was then evaluated using Beer’s law.<sup>1</sup>

### IX. Energy dispersive X-ray spectroscopy (EDS) Analysis.

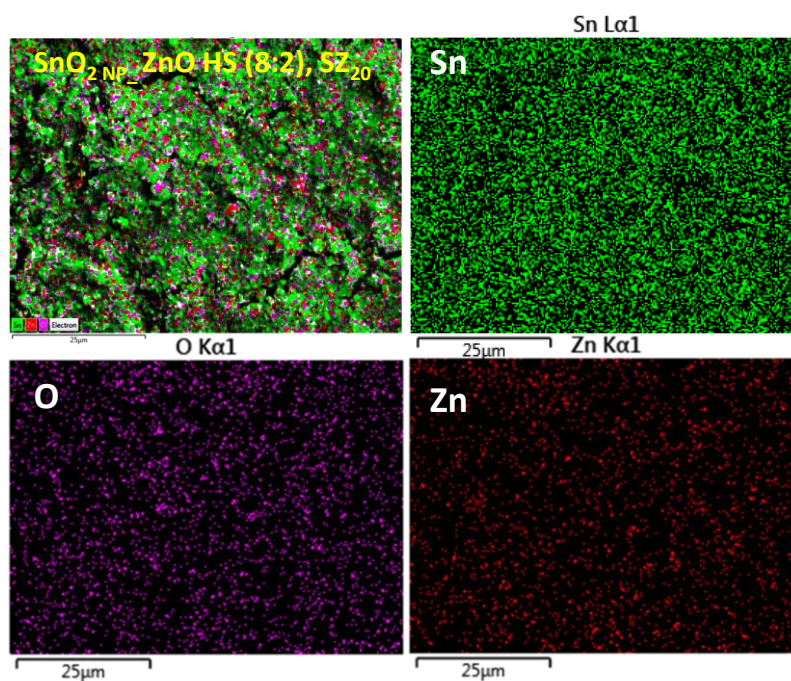

**Figure S7:** Energy dispersive X-ray spectroscopy (EDS) mapping of the best performing composite photoanode i.e. SnO<sub>2</sub> NP\_ZnO HS (8:2), SZ<sub>20</sub>.

**X:** A comparative study of various SnO<sub>2</sub>\_ZnO based Photovoltaics

**Table S3:** A comparative study of various SnO<sub>2</sub>\_ZnO based Photovoltaics.

| <b>Primary photoanode material used</b> | <b>Secondary /Composite Material used</b> | <b>Sensitizer Used</b> | <b>PCE, η (%)</b> | <b>Reference</b>    |
|-----------------------------------------|-------------------------------------------|------------------------|-------------------|---------------------|
| SnO <sub>2</sub> nanoparticle           | ZnO nanorod overlayer                     | N719                   | ~2.62 %           | 2                   |
| SnO <sub>2</sub> nanoparticles          | ZnO nanotetrapods                         | N719                   | ~ 4.91 %          | 3                   |
| SnO <sub>2</sub> nanoparticles          | ZnO microparticles                        | N719                   | ~4.96 %           | 4                   |
| SnO <sub>2</sub>                        | Li Doped ZnO nanoparticles (LZN)          | N719                   | ~2.06%            | 5                   |
| SnO <sub>2</sub> Nanoparticles          | ZnO Nanotetrapods                         | N719                   | ~6.31 %           | 6                   |
| SnO <sub>2</sub> Nanoparticle           | ZnO Nanoparticle                          | D149                   | ~3.6 %            | 7                   |
| SnO <sub>2</sub> Nanoparticle           | ZnO Nanoparticle                          | N3                     | ~ 1.5 %           | 7                   |
| <b>SnO<sub>2</sub> Nanoparticle</b>     | <b>ZnO Hollow Sphere</b>                  | <b>N719</b>            | <b>~4.37 %</b>    | <b>Present Work</b> |

### XI: Stability tests of SnO<sub>2</sub> and SZ<sub>20</sub> based DSSCs

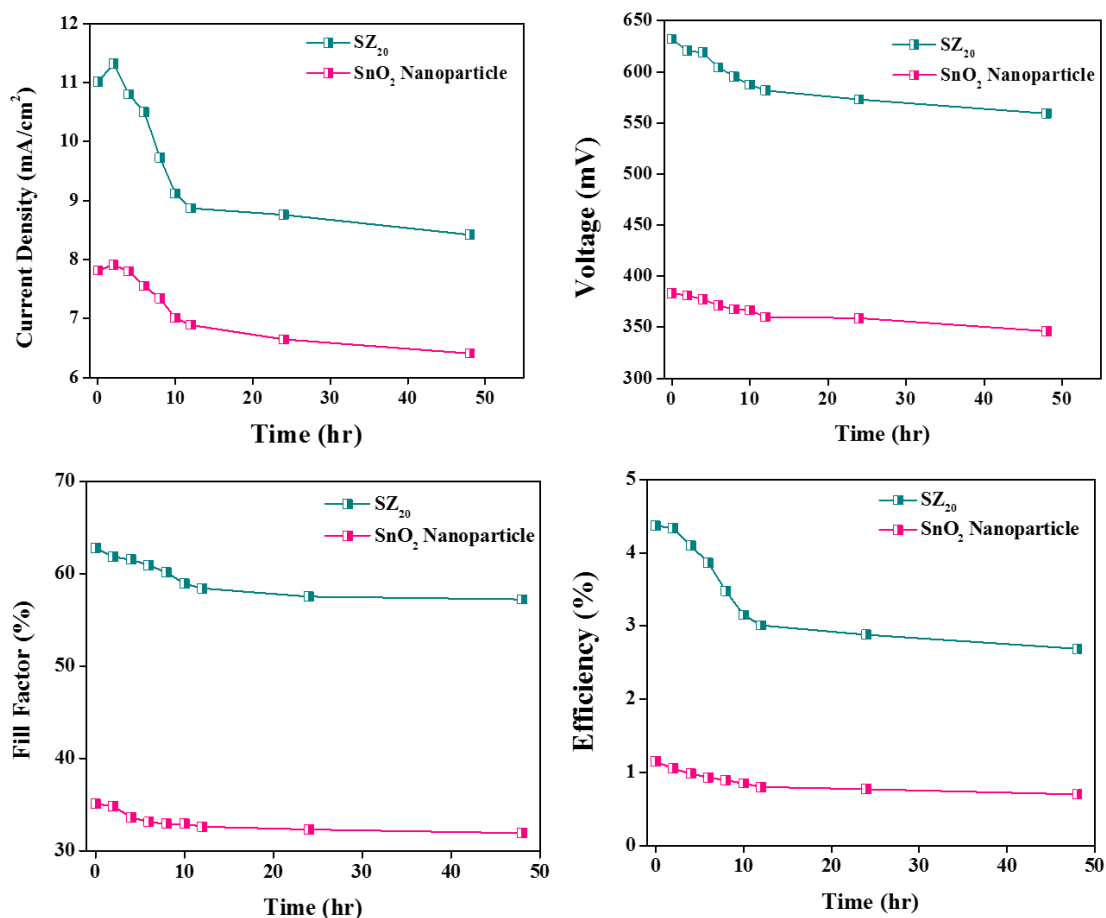

**Figure S8:** Stability tests for SnO<sub>2</sub> and SZ<sub>20</sub> based DSSCs.

Figure S8 depicts the stability tests for the fabricated SnO<sub>2</sub> NP based and the best performed composite device i.e. SnO<sub>2</sub> NP\_ZnO HS (8:2), SZ<sub>20</sub> and here and included in the supporting information of the revised version. In order to check the stability of the devices, dependence of photovoltaic parameters such as short circuit current density ( $J_{sc}$ ), open circuit voltage ( $V_{oc}$ ), Fill factor (FF) and the power conversion efficiency ( $\eta$ ) on time durations (over 48 h) are shown in Fig. R1. The photovoltaic characteristics are collected at an interval of 2h for 12h and then up to 48h in ambient condition and it has been found that SnO<sub>2</sub> NP based and SZ<sub>20</sub> based devices show a ~39.1% and ~38.4% reduction of efficacy respectively after 48h duration.



## XII: Table S4: EIS fitting parameters for devices

| <b>DSSC<br/>photoanode</b>                                | <b>R<sub>s</sub><sup>a</sup><br/>(Ohm)</b> | <b>R<sub>ct1</sub><sup>a</sup><br/>(Ohm)</b> |
|-----------------------------------------------------------|--------------------------------------------|----------------------------------------------|
| SnO <sub>2</sub> NP                                       | 22.51                                      | 3.97                                         |
| SnO <sub>2</sub> NP _ ZnO HS (9:1), SZ <sub>10</sub>      | 21.83                                      | 4.17                                         |
| <b>SnO<sub>2</sub> NP _ ZnO HS (8:2), SZ<sub>20</sub></b> | <b>20.11</b>                               | <b>3.91</b>                                  |
| SnO <sub>2</sub> NP _ ZnO HS (7:3), SZ <sub>30</sub>      | 21.65                                      | 4.06                                         |

### References:

1. Fan, K.; Liu, M.; Peng, T. Y.; Ma, L.; Dai, K., Effects of paste components on the properties of screen-printed porous TiO<sub>2</sub> film for dye-sensitized solar cells. *Renew. Energy* 2010, 35 (2), 555-561.
2. Huu, N. K.; Son, D. Y.; Jang, I. H.; Lee, C. R.; Park, N. G., Hierarchical SnO<sub>2</sub> Nanoparticle-ZnO Nanorod Photoanode for Improving Transport and Life Time of Photoinjected Electrons in Dye-Sensitized Solar Cell. *Acs Appl Mater Inter* 2013, 5 (3), 1038-1043.
3. Chen, W.; Qiu, Y. C.; Yang, S. H., A new ZnO nanotetrapods/SnO<sub>2</sub> nanoparticles composite photoanode for high efficiency flexible dye-sensitized solar cells. *Phys Chem Chem Phys* 2010, 12 (32), 9494-9501.
4. Milan, R.; Selopal, G. S.; Epifani, M.; Natile, M. M.; Sberveglieri, G.; Vomiero, A.; Concina, I., ZnO@SnO<sub>2</sub> engineered composite photoanodes for dye sensitized solar cells. *Sci Rep* 2015, 5, 1-12.
5. Hung, I. M.; Bhattacharjee, R., Effect of Photoanode Design on the Photoelectrochemical Performance of Dye-Sensitized Solar Cells Based on SnO<sub>2</sub> Nanocomposite. *Energies* 2016, 9 (8), 1-11.
6. Chen, W.; Qiu, Y. C.; Zhong, Y. C.; Wong, K. S.; Yang, S. H., High-Efficiency Dye-Sensitized Solar Cells Based on the Composite Photoanodes of SnO<sub>2</sub> Nanoparticles/ZnO Nanotetrapods. *J Phys Chem A* 2010, 114 (9), 3127-3138.

7. Arai, T.; Kondo, S.; Nakano, S.; Kuramoto, T., Performance improvement of a tin(II) dioxide-modified electrode for the dye-sensitized solar cell by the addition of zinc(II) oxide and niobium(V) oxide. *Inorg Chim Acta* **2013**, 395, 19-23.
